1 **Full title: Gut microbiome features associated with *Clostridium difficile* colonization in puppies**

2 Short title: *Clostridium difficile* and the gut microbiome in puppies

3

4 Alexander S. Berry<sup>1</sup>, Denise Barnhart<sup>2</sup>, Brendan J. Kelly<sup>3</sup>, Donna J. Kelly<sup>2</sup>, Daniel P. Beiting<sup>4</sup>, Robert N. Baldassano<sup>1</sup>, Laurel E. Redding<sup>4</sup>

5

6

7 <sup>1</sup>Division of Gastroenterology, Hepatology, and Nutrition, Children's Hospital of Philadelphia, Philadelphia, PA, USA

8

9 <sup>2</sup>Department of Pathobiology, University of Pennsylvania, School of Veterinary Medicine, Kennett Square, PA

10

11 <sup>3</sup>Divisions of Infectious Diseases and Epidemiology, Perelman School of Medicine, University of Pennsylvania, Philadelphia, PA, USA

12

13 <sup>4</sup>Department of Clinical Sciences, University of Pennsylvania, School of Veterinary Medicine, Kennett Square, PA, USA

14

15 Authors' contributions:

16 ASB: data curation, methodology, formal analysis, investigation, software and writing – original draft preparation and review and  
17 editing, visualization

18 DB: investigation, methodology

19 BJK: conceptualization, formal analysis, methodology, writing – review and editing

20 DJK: investigation, methodology, writing

21 DPB: Supervision, writing, resources

22 RNB: Supervision, resources

23 LER: conceptualization, data curation, funding acquisition, investigation, methodology, project administration, resources,  
24 supervision, writing – original draft preparation and review and editing

26 **Abstract**

27 In people, colonization with *Clostridium difficile*, the leading cause of antibiotic-associated diarrhea, has been shown to be  
28 associated with distinct gut microbial features, including reduced bacterial community diversity and depletion of key taxa. In dogs,  
29 the gut microbiome features that define *C. difficile* colonization are less well understood. We sought to define the gut microbiome  
30 features associated with *C. difficile* colonization in puppies, a population where the prevalence of *C. difficile* has been shown to be  
31 elevated, and to define the effect of puppy age and litter upon these features and *C. difficile* risk. We collected fecal samples from  
32 weaned (n=27) and unweaned (n=74) puppies from 13 litters and analyzed the effects of colonization status, age and litter on  
33 microbial diversity using linear mixed effects models.

34 Colonization with *C. difficile* was significantly associated with younger age, and colonized puppies had significantly decreased  
35 bacterial community diversity and differentially abundant taxa compared to non-colonized puppies, even when adjusting for age. *C.*  
36 *difficile* colonization remained associated with decreased bacterial community diversity, but the association did not reach statistical  
37 significance in a mixed effects model incorporating litter as a random effect.

38 Even though litter explained a greater proportion (67%) of the variability in microbial diversity than colonization status, we  
39 nevertheless observed heterogeneity in gut microbial community diversity and colonization status within more than half of the  
40 litters, suggesting that the gut microbiome contributes to colonization resistance against *C. difficile*. The colonization of puppies with

41 *C. difficile* has important implications for the potential zoonotic transfer of this organism to people. The identified associations point  
42 to mechanisms by which *C. difficile* colonization may be reduced.

43

44

45

46 Keywords: *Clostridium difficile*, canine, microbial ecology, litter effect, zoonosis

47

48 **Introduction:**

49 *Clostridium difficile* is a spore-forming anaerobic, gram-positive bacillus that is the leading cause of antibiotic-associated and  
50 nosocomial diarrhea in humans and a significant enteric pathogen in many species of animals. Administration of antibiotics is the  
51 primary risk factor for the development of *C. difficile* infection (CDI). However, patients can develop CDI outside of a healthcare  
52 facility without the prior use of antibiotics, and community-acquired CDIs are now thought to account for one quarter of infections  
53 (1, 2).

54 The source of community-acquired infections has not been definitively established. People asymptomatically colonized with  
55 *C. difficile* are potential reservoirs (3), but zoonotic, environmental, and food-borne transmission to people has also been posited.  
56 The presence of *C. difficile* in companion animals has been documented since the 1980's, and dogs and cats were posited as a  
57 potential reservoir species as early as 1983 (4). Given the close contact between people and their pets, colonized or infected  
58 companion animals may represent an important transmission source for this pathogen. As in other species of animals (5-8), including  
59 human infants (9-11), *C. difficile* is highly prevalent in the feces of puppies (12-14). Understanding how colonization is regulated in  
60 puppies might reduce their colonization with *C. difficile* and the potential transmission to pet owners.

61 The role of the commensal gut microbiota in *C. difficile* colonization resistance has been demonstrated in people (15-19) and  
62 in certain species of animals (20-22). Human subject and animal model studies suggest key microbiome features, including  
63 community diversity and specific taxa, are involved in protection against *C. difficile*. No such association has been demonstrated in

64 dogs, and studies of the association between the administration of antibiotics (and the consequent disruption of the gut microbiota)  
65 and *C. difficile* colonization/infection in dogs have yielded mixed results (23, 24). The evolution of the neonatal canine gut  
66 microbiome has been described, with increasing diversity and taxonomic shifts occurring with increasing age (25). As has been found  
67 in human infants (17), it is possible that certain taxonomic patterns and a lack of microbial community diversity in the gut may be  
68 associated with a lack of colonization resistance to *C. difficile*.

69 The objective of this study was to define the gut microbiome features associated with *C. difficile* colonization in puppies and  
70 to define the effects of puppy age and litter on the risk of colonization. The results could contribute to a better understanding of *C.*  
71 *difficile* colonization in puppies and their potential to serve as a reservoir for this pathogen.

72

### 73 **Materials and Methods:**

74

75 Samples: Fecal samples were obtained by pet owners bringing their puppies to the pediatric service at the Veterinary Hospital of the  
76 University of Pennsylvania and by breeders in the greater Philadelphia area who collected fecal samples from their puppies and  
77 shipped them on ice overnight to the laboratory. All puppies were healthy at the time of sampling, and none had received  
78 antimicrobial therapy. After collection, samples were split into sterile cryogenic vials. One aliquot was processed for culture within  
79 24 hours, while others were stored at -80°C and processed subsequently in batch for the 16S ribosomal RNA (rRNA) sequencing.

80 Frozen samples were thawed only once prior to processing. This study was approved by the Institutional Animal Care and Use  
81 Committee of the University of Pennsylvania (protocol number 806539).

82 Anaerobic culture and toxigenic testing: A 0.5 g pellet of formed fecal sample was mixed with 0.5 ml of 100% ethanol. The mixture  
83 remained for 60 minutes at room temperature before being inoculated on BBL™ CDSA/*Clostridium difficile* selective agar (BD;  
84 Sparks, Maryland, USA) and Columbia CNA agar (Remel; Lenexa, KS, USA). Inoculated plates were incubated at 35°C under anaerobic  
85 growth conditions for seven days and checked for growth every other day. Suspect colonies were identified and isolated. Isolates  
86 were confirmed to be *C. difficile* by Maldi-TOF MS identification and/or RapID™ ANA II System (ThermoFisher Scientific, USA).  
87 Confirmed isolates of *C. difficile* were inoculated into BHI broth and/or cooked meat broth to induce toxin production. The broth was  
88 incubated anaerobically at 35°C for 48 hours. The supernatant was collected and tested by EIA (TechLab *C. difficile* Tox A/B II™) for  
89 toxin production.

90

91 16 S sequencing

92 DNA was extracted from the fecal samples using Qiagen Power Soil DNA Extraction Kit (Qiagen, Hilden, Germany) using 0.25 g of  
93 each fecal pellet as input. Extraction and PCR blanks were used to control for environmental contamination and mock communities  
94 were used to control for contamination across wells. The V4 region of the 16S rRNA gene was amplified using barcoded primers for

95 use on the Illumina platform (26). The concentration of each PCR product was determined using a PicoGreen assay, and samples  
96 were normalized to equal amounts and pooled. Sequencing was performed using 250-base paired-end chemistry on an Illumina  
97 MiSeq instrument with an average read depth of 49,436 reads per sample. Three samples were dropped due to low read depth  
98 (<4000 reads per sample), raising the average read depth to 50,860 reads per sample. Sequences were demultiplexed using the  
99 Quantitative Insights into Microbial Ecology (QIIME2) software (27), and denoised using DADA2 (28). Sequences were aligned using  
100 Mafft (29) and phylogenetic reconstruction was performed using Fasttree (30). Finally, sequences were rarefied to 11,700 reads per  
101 sample for calculating alpha- and beta-diversity metrics.

102

### 103 Analysis:

104 The effects of age and litter on culture status were analyzed by logistic regression. Metrics of alpha and beta diversity of the fecal  
105 microbiome were calculated using the qiime diversity core-metrics-phylogenetic function in qiime2 and visualized using QIIME2 and  
106 Emperor (31).

107 The alpha diversity was calculated for each sample using the Shannon index. Differences in alpha diversity between *C.*  
108 *difficile*-infected and uninfected puppies were assessed using (1) univariable linear regression (N=98), (2) linear regression  
109 controlling for puppy age (N=98), and (3) a linear mixed effects model (LMM) on all unweaned puppies, controlling for age and using  
110 litter as a random effect (N=70) using the lme4 package in R (32). The effect of *C. difficile* colonization status on microbiome alpha

111 diversity was assessed by comparing the likelihoods of the LMM with and without the fixed effect of *C. difficile* infection status using  
112 an analysis of variance. Finally, the effect of *C. difficile* toxigenicity on alpha diversity among *C. difficile*-positive puppies was assessed  
113 using univariable linear regression (N=35).

114 The effect of *C. difficile* culture status on the per-specimen bacterial community diversity of the fecal microbiome was first  
115 assessed by univariable analysis. Univariable analysis was also performed to identify clustering of specimens by colonization status,  
116 using the PERMANOVA test applied to pairwise distances as determined by the beta diversity metrics Bray-Curtis, unweighted  
117 unifrac, and weighted unifrac. The effect of *C. difficile* culture status on beta diversity of the microbiome adjusted for puppy age and  
118 litter was assessed using mixed effects PERMANOVA. Age and culture status were considered fixed effects, while litter was  
119 considered a random effect. All comparisons were two-tailed, and  $P < 0.05$  was considered to represent statistical significance.  
120 PERMANOVA tests were performed using the vegan package (33) as implemented in R v.3.5.2 (R Core Team, 2018). Principal  
121 coordinates analysis (PCoA) was performed using phyloseq (34) to visualize the clustering of samples by various parameters (*C.*  
122 *difficile* status, age, litter).

123 A taxonomic classifier trained on the GreenGenes database with 99% Operational taxonomic units (OTUs) was used to assign  
124 relative abundances of OTUs for each sample calculated at the genus level. The relative contributions of different microbial taxa that  
125 characterize the differences between *C. difficile* culture positive and negative puppies were assessed through linear discriminant  
126 analysis effect size (LEfSe) using the tools found at <http://huttenhower.sph.harvard.edu/galaxy/>. OTUs were filtered such that only



127 those with >5% relative abundance in one or more samples and with LDA scores > 2.0 were considered to be significant. All plots  
128 were generated using the ggplot2 package in R (35).

129

## 130 **Results**

### 131 Subject characteristics and *C. difficile* status

132 A total of 101 samples were collected from puppies ranging in age from 2-28 weeks. Seventy-four of the samples were obtained  
133 from 13 different litters of puppies that were still with their dam, and 27 samples were obtained from older weaned puppies that  
134 had been placed with families. The distribution of age was bi-modal, with the age of unweaned puppies in litters being significantly  
135 lower ( $p=0.01$ ) than that of the weaned puppies (Figure 1). The mean (SD) age of the unweaned puppies was 3.7 (0.8) weeks,  
136 whereas that of the weaned puppies was 11.4 (2.9) weeks. Litters ranged in size from 3 to 12 puppies, with a mean (SD) of 5.8 (2.9)  
137 puppies.

138 **Figure 1:** Distribution of the ages of puppies sampled in the greater Philadelphia region

139

140 Thirty-seven samples (36.3%) were culture-positive for *C. difficile*, and 19 (51%) of these *C. difficile* isolates were toxigenic. All  
141 of samples from the weaned puppies ( $n=27$ ) were culture-negative. In 6 of the 13 litters of puppies, colonization status was the same

142 for all puppies (i.e., all puppies within the litter were culture-negative or culture-positive). Age was significantly associated with  
143 culture status, with younger puppies being significantly more likely to harbor *C. difficile* (OR=0.46, p=0.004, 95% CI=0.27-0.78).

144

145 Association between *C. difficile* status, age and microbiome diversity in all puppies

146 Complete 16 S sequencing was performed on 101 fecal samples. Three culture-negative samples were dropped from  
147 subsequent analyses because of low coverage. Alpha diversity was significantly lower (p<0.001) in the *C. difficile*-positive fecal  
148 samples than in the *C. difficile*-negative fecal samples (Figure 2). When adjusting for age, the effect of *C. difficile* status on microbial  
149 community diversity was mitigated but persistent (p-value increased 2 orders of magnitude from  $1.6 \times 10^{-7}$  to  $6 \times 10^{-5}$ ). There was no  
150 difference in diversity between puppies colonized with toxigenic *C. difficile* and non-toxigenic *C. difficile* (p=0.66).

151

152 **Figure 2.** Boxplot of the Shannon diversity indices among *C. difficile*-positive puppies (left) and *C. difficile*-negative puppies (right).

153 Boxes display the median, first and third quartiles, and whiskers extend to the minimum and maximum, while points represent  
154 outliers.

155

156 Beta diversity, or the dissimilarity between microbiome communities, was assessed using Bray-Curtis, weighted unifrac, and  
157 unweighted unifrac. Univariable analysis showed a significant difference between microbial communities using all three metrics  
158 ( $p=0.0001$ ) even when controlling for age ( $p<0.0002$ ) (Figure 3). The Bray-Curtis dissimilarity is summarized in a PCoA plot (Figure 3).

159  
160 **Figure 3.** Box plots showing dissimilarity in bacterial communities in *C. difficile*-positive and *C. difficile*-negative fecal samples from  
161 puppies in the greater Philadelphia area. The dissimilarity among *C. difficile* positive puppies is displayed in the left boxplots and the  
162 dissimilarity between culture positive and negative puppies is displayed in the right boxplots. Boxes display the median, first and  
163 third quartiles, and whiskers extend to the minimum and maximum, while points represent outliers.

164  
165 We found several taxa of bacteria to be differentially enriched in the *C. difficile*-positive and -negative samples. *C. difficile*-  
166 positive samples were enriched with members the *Escherichia*, *Bacteroides*, *Enterococcus* and *Parabacteroides* genera (Figure 4).  
167 Taxa from the *Escherichia* genus were found at relative abundance levels exceeding 10% in 48 samples and 50% in 15 samples. The  
168 relative abundance of *Escherichia* was associated with much of the clustering along the axis of principal component 1 (Figure 5). In  
169 contrast, *C. difficile*-negative samples were enriched with members of the *Prevotella*, *Megamonas*, and *Streptococcus* genera.  
170 Unweaned puppies that were not colonized with *C. difficile* had higher relative abundance of taxa from the *Clostridia* genera than  
171 unweaned puppies that were colonized with *C. difficile*.

172

173 **Figure 4.** Linear discriminant analysis effect size analysis shows genera of bacteria that are differentially expressed in the *C. difficile*-  
174 positive and *C. difficile*-negative fecal samples from puppies in the greater Philadelphia area. Only organization taxonomic units with  
175 >5% relative abundance in one or more samples and with LDA scores > 2.0 are shown.

176

177 **Figure 5. A.** Bray-Curtis principal component analysis shows clustering of fecal samples from puppies in the greater Philadelphia area  
178 by *C. difficile* colonization status and by litter. Fecal samples labeled “Misc.” are from older weaned puppies that were no longer in  
179 litters and resided with their owner. **B.** Relative abundance of the genus *Escherichia* increases along the x-axis of the PCoA.

180

181

182

183 Association between *C. difficile* status, age, litter, and microbiome diversity in unweaned puppies

184 To evaluate the effect of litter on the observed association between fecal bacterial community diversity and *C. difficile* colonization,  
185 we restricted analysis to the 70 unweaned puppies from 13 litters for which litter data were available. Seven of these litters  
186 consisted of a mix of colonized and non-colonized puppies, whereas in six of these litters, all of the puppies were of the same

187 colonization status. When controlling for litter, *C. difficile* status had no effect on microbial alpha diversity ( $p=0.5468$ ). Among these  
188 unweaned puppies, the litter explained most (67%,  $p= 1.0e-4$ ) of the dissimilarity between bacterial communities, and colonization  
189 with *C. difficile* was no longer significantly correlated with microbiome composition ( $p > 0.1$ ). PCoA analysis showed distinct  
190 clustering within most litters, but not necessarily by colonization status within a litter (Supplemental Figure 1).

191

192 **Supplemental Figure 1.** Principal component analysis plot showing clustering of fecal samples from seven litters of puppies in the  
193 greater Philadelphia area where puppies within litters had different *C. difficile* colonization status

194

195

196

197 Discussion

198 Asymptomatic carriage of *C. difficile* is common in young animals of many species, including humans, dogs, pigs, and horses.

199 In people, colonization with *C. difficile* has been shown to be associated with altered gut microbial diversity (17, 19, 36-38), but no

200 studies have examined this association in dogs. We found that the association between lower bacterial community diversity and *C.*

201 *difficile* colonization was statistically significant even when accounting for age, and certain bacterial taxa were preferentially  
202 associated with *C. difficile* colonization.

203 As has been found in other studies (14, 25), both colonization with *C. difficile* and reduced gut microbial diversity in puppies  
204 were significantly associated with young age. Similar associations have also been found in human studies (17, 19, 36, 39). However,  
205 within litters, this association was no longer significant. Puppies of a same litter are exposed to the same environment, consume the  
206 same diet (i.e., dam's milk), and are coprophagic. It is therefore not surprising that similar gut microbial communities are seen  
207 among puppies of a litter, as we found and as was found in a previous study of 30 German Shepherd litters (40). Microbial  
208 communities, presumably along with *C. difficile*, are likely shared among littermates. However, even within litters, we noted  
209 heterogeneity in the fecal microbiome (Figure 5) and in colonization status. In more than half of the litters (7/13), there were  
210 colonized and non-colonized puppies, suggesting that either our sample sizes were too small to detect a significant association  
211 between colonization status and microbial diversity, or other unmeasured factors were associated with colonization. The  
212 heterogeneity in the fecal microbiome within a litter may be analogous to the cage effect in mice studies (41, 42), where significant  
213 interindividual differences in intestinal microbiota were seen among mice within a cage, even though they were bred and raised in  
214 highly controlled similar conditions.

215           While the association between gut microbial diversity and *C. difficile* colonization status did not attain statistical significance  
216 within a litter, it is likely that features of the gut microbiome nevertheless contribute to the establishment and persistence of *C.*  
217 *difficile*. We found *C. difficile*-positive samples to be enriched with members of the *Escherichia*, *Bacteroides*, *Enterococcus* and  
218 *Parabacteroides* genera, and *C. difficile*-negative samples with members of the *Prevotella*, *Megamonas*, and *Streptococcus* genera.  
219 Almost identical trends were found for taxa of the *Escherichia*, *Parabacteroides*, *Enterococcus*, *Prevotella* and *Megamonas* genera in  
220 one study comparing *C. difficile* non-colonized, asymptotically colonized and infected human adults (19), and for taxa of the  
221 *Parabacteroides*, *Prevotella*, *Paraprevotella* and *Enterococcus* genera in another study of non-colonized and colonized adults (38).  
222 Similar findings were found for the *Bacteroides* genera in a study of human infants (39). In particular, increased relative abundances  
223 of taxa from the *Parabacteroides* and *Enterococcus* genera are thought to be the result of a blooming phenomenon associated with  
224 reduced ecological niche competition in people with CDI (38, 43, 44).

225           Among unweaned puppies, we found that noncolonized puppies had higher relative abundances of taxa from the *Clostridia*  
226 genera compared to colonized puppies. Consistent with this finding, other studies have postulated that bacterial species that are  
227 phylogenetically related to *C. difficile* and share niches and compete for similar resources could provide colonization resistance  
228 against toxigenic *C. difficile* (45, 46). In fact, colonization with non-toxigenic *C. difficile* has been shown to prevent infection with  
229 toxigenic *C. difficile* in hamsters and people following administration of antibiotics (46-48).

230 In contrast to our findings, one study showed that noncolonized human infants had lower relative abundance of taxa from  
231 the *Escherichia* genera than colonized infants (17), while several other studies found *Bacteroides* spp in greater relative abundance  
232 in non-colonized human infants, children and adults (19, 36, 49, 50). It is unclear why these discrepancies were observed in our  
233 study. Both *Bacteroides* spp, which are used as markers of a healthy gut in people (50), and *E. coli* are found in the feces of healthy  
234 puppies (25, 51). *Bacteroides* spp are found in increasing relative abundance with increasing age, while *E. coli* levels are significantly  
235 higher in younger (less than 21 days) puppies than in older (greater than 42 days) puppies (25). Our findings underscore that puppies  
236 colonized with *C. difficile* nevertheless retain much of the gut microbiota of healthy animals and point to possible species-specific  
237 differences in the impact of *C. difficile* on the gut microbiome.

238 While some of the general trends were similar in our study and in several human studies, it is important to note that GI  
239 microbiota differ significantly by species, and extrapolation from human to animals is not always possible or prudent. In one study,  
240 for example, microbial groups associated with *C. difficile* colonization status were significantly different for people and poultry (52).  
241 However, the canine gut microbiome has been shown to be more similar to the human gut microbiome than that of pigs and mice  
242 (53, 54), perhaps due to their shared environments and diets, which might be why we observed similar microbiological trends in  
243 puppies and people.



244           The large proportion of puppies colonized with *C. difficile* has important implications for the potential zoonotic transmission  
245 of this organism. While it is likely that a puppy's litter (and resultant environmental exposures) is the main determinant of  
246 colonization status, it is also likely that the puppy's microbiome has an effect. The small number of puppies in each litter and the  
247 limited number of litters with colonized and non-colonized puppies precluded us from establishing whether the effect was  
248 statistically significant, but microbial community signatures that were consistent with what has been observed in people suggest  
249 that the microbiome has a role to play in colonization resistance. The protective role of the gut microbiome is particularly important  
250 when considering the fact that many puppies sold in pet stores (up to 95%) receive prophylactic antibiotics prior to shipping, as was  
251 recognized in a recent outbreak of Campylobacteriosis associated with puppies in pet stores (55). This could result in gastrointestinal  
252 dysbiosis and a resultant predisposition to harboring pathogens such as *C. difficile*. More research is needed to (1) better understand  
253 the interaction between the gut microbiome and colonization and infection with *C. difficile* in dogs, especially at the level of the  
254 litter; (2) define the relationship between dog-colonizing *C. difficile* strains and human colonizing strains; and (3) understand how  
255 interventions that reduce colonization in human pets may impact human disease prevention.

256

257   **Conclusions:**

258 We found that colonization with *C. difficile* is associated with reduced gut microbiome diversity in puppies, even when adjusting for  
259 the puppy's age, and that there were differentially-abundant taxa in *C. difficile*-positive and *C. difficile*-negative fecal samples that  
260 may be permissive in promoting the colonization and establishment of *C. difficile*. Though this effect was not observed at the level of  
261 the litter, and even though the litter explained a large proportion of the gut microbiome diversity, heterogeneity in the gut  
262 microbiome and in *C. difficile* colonization within litters was observed in more than half of the litters, suggesting that the gut  
263 microbiome and potentially other unmeasured factors contribute to colonization resistance against *C. difficile* in puppies.

264

265

266

267

268

269

270

271

272 **References**

273

- 274 1. Khanna S, Baddour LM, Huskins WC, Kammer PP, Faubion WA, Zinsmeister AR, et al. The epidemiology of Clostridium difficile infection in  
275 children: a population-based study. *Clinical infectious diseases : an official publication of the Infectious Diseases Society of America*.  
276 2013;56(10):1401-6.
- 277 2. Karlstrom O, Fryklund B, Tullus K, Burman LG. A prospective nationwide study of Clostridium difficile-associated diarrhea in Sweden. The  
278 Swedish C. difficile Study Group. *Clin Infect Dis*. 1998;26(1):141-5.
- 279 3. Galdys AL, Curry SR, Harrison LH. Asymptomatic Clostridium difficile colonization as a reservoir for Clostridium difficile infection. *Expert*  
280 *review of anti-infective therapy*. 2014;12(8):967-80.
- 281 4. Borriello SP, Honour P, Turner T, Barclay F. Household pets as a potential reservoir for Clostridium difficile infection. *J Clin Pathol*.  
282 1983;36(1):84-7.
- 283 5. Hopman NE, Keessen EC, Harmanus C, Sanders IM, van Leengoed LA, Kuijper EJ, et al. Acquisition of Clostridium difficile by piglets.  
284 *Veterinary microbiology*. 2011;149(1-2):186-92.
- 285 6. Hammitt MC, Bueschel DM, Keel MK, Glock RD, Cuneo P, DeYoung DW, et al. A possible role for Clostridium difficile in the etiology of calf  
286 enteritis. *Veterinary microbiology*. 2008;127(3-4):343-52.
- 287 7. Jones RL, Adney WS, Alexander AF, Shideler RK, Traub-Dargatz JL. Hemorrhagic necrotizing enterocolitis associated with Clostridium  
288 difficile infection in four foals. *J Am Vet Med Assoc*. 1988;193(1):76-9.

- 289 8. Baverud V, Gustafsson A, Franklin A, Aspan A, Gunnarsson A. Clostridium difficile: prevalence in horses and environment, and  
290 antimicrobial susceptibility. Equine veterinary journal. 2003;35(5):465-71.
- 291 9. Collignon A, Ticchi L, Depitre C, Gaudelus J, Delmee M, Corthier G. Heterogeneity of Clostridium difficile isolates from infants. European  
292 journal of pediatrics. 1993;152(4):319-22.
- 293 10. Rousseau C, Poilane I, De Pontual L, Maherault AC, Le Monnier A, Collignon A. Clostridium difficile carriage in healthy infants in the  
294 community: a potential reservoir for pathogenic strains. Clin Infect Dis. 2012;55(9):1209-15.
- 295 11. Adlerberth I, Huang H, Lindberg E, Aberg N, Hesselmar B, Saalman R, et al. Toxin-producing Clostridium difficile strains as long-term gut  
296 colonizers in healthy infants. Journal of clinical microbiology. 2014;52(1):173-9.
- 297 12. Buogo C, Burnens AP, Perrin J, Nicolet J. [Presence of Campylobacter spp., Clostridium difficile, C. perfringens and salmonellae in litters  
298 of puppies and in adult dogs in a shelter]. Schweizer Archiv fur Tierheilkunde. 1995;137(5):165-71.
- 299 13. Perrin J, Buogo C, Gallusser A, Burnens AP, Nicolet J. Intestinal carriage of Clostridium difficile in neonate dogs. Zentralblatt fur  
300 Veterinarmedizin Reihe B Journal of veterinary medicine Series B. 1993;40(3):222-6.
- 301 14. Alvarez-Perez S, Blanco JL, Pelaez T, Lanzarot MP, Harmanus C, Kuijper E, et al. Faecal shedding of antimicrobial-resistant Clostridium  
302 difficile strains by dogs. The Journal of small animal practice. 2015;56(3):190-5.
- 303 15. Britton RA, Young VB. Interaction between the intestinal microbiota and host in Clostridium difficile colonization resistance. Trends  
304 Microbiol. 2012;20(7):313-9.

- 305 16. Chang JY, Antonopoulos DA, Kalra A, Tonelli A, Khalife WT, Schmidt TM, et al. Decreased diversity of the fecal Microbiome in recurrent  
306 Clostridium difficile-associated diarrhea. J Infect Dis. 2008;197(3):435-8.
- 307 17. Rousseau C, Levenez F, Fouqueray C, Dore J, Collignon A, Lepage P. Clostridium difficile colonization in early infancy is accompanied by  
308 changes in intestinal microbiota composition. Journal of clinical microbiology. 2011;49(3):858-65.
- 309 18. Samarkos M, Mastrogianni E, Kampouroupoulou O. The role of gut microbiota in Clostridium difficile infection. Eur J Intern Med.  
310 2018;50:28-32.
- 311 19. Zhang L, Dong D, Jiang C, Li Z, Wang X, Peng Y. Insight into alteration of gut microbiota in Clostridium difficile infection and asymptomatic  
312 C. difficile colonization. Anaerobe. 2015;34:1-7.
- 313 20. Burdet C, Sayah-Jeanne S, Nguyen TT, Hugon P, Sablier-Gallis F, Saint-Lu N, et al. Antibiotic-Induced Dysbiosis Predicts Mortality in an  
314 Animal Model of Clostridium difficile Infection. Antimicrobial agents and chemotherapy. 2018;62(10).
- 315 21. Rodriguez C, Taminiau B, Brevers B, Avesani V, Van Broeck J, Leroux A, et al. Faecal microbiota characterisation of horses using 16 rDNA  
316 barcoded pyrosequencing, and carriage rate of clostridium difficile at hospital admission. BMC microbiology. 2015;15:181.
- 317 22. Grzeskowiak LM, Pieper R, Huynh HA, Cutting SM, Vahjen W, Zentek J. Impact of early-life events on the susceptibility to Clostridium  
318 difficile colonisation and infection in the offspring of the pig. Gut Microbes. 2018:1-9.
- 319 23. Hussain I, Sharma RK, Borah P, Rajkhowa S, Hussain I, Barkalita LM, et al. Isolation and characterization of Clostridium difficile from pet  
320 dogs in Assam, India. Anaerobe. 2015;36:9-13.

- 321 24. Weese JS, Armstrong J. Outbreak of Clostridium difficile-associated disease in a small animal veterinary teaching hospital. Journal of  
322 veterinary internal medicine. 2003;17(6):813-6.
- 323 25. Guard BC, Mila H, Steiner JM, Mariani C, Suchodolski JS, Chastant-Maillard S. Characterization of the fecal microbiome during neonatal  
324 and early pediatric development in puppies. PloS one. 2017;12(4):e0175718.
- 325 26. Jasarevic E, Howard CD, Morrison K, Misic A, Weinkopff T, Scott P, et al. The maternal vaginal microbiome partially mediates the effects  
326 of prenatal stress on offspring gut and hypothalamus. Nat Neurosci. 2018;21(8):1061-71.
- 327 27. Caporaso JG, Kuczynski J, Stombaugh J, Bittinger K, Bushman FD, Costello EK, et al. QIIME allows analysis of high-throughput community  
328 sequencing data. Nature methods. 2010;7(5):335-6.
- 329 28. Callahan BJ, McMurdie PJ, Rosen MJ, Han AW, Johnson AJ, Holmes SP. DADA2: High-resolution sample inference from Illumina amplicon  
330 data. Nature methods. 2016;13(7):581-3.
- 331 29. Katoh K, Standley DM. MAFFT multiple sequence alignment software version 7: improvements in performance and usability. Molecular  
332 biology and evolution. 2013;30(4):772-80.
- 333 30. Price MN, Dehal PS, Arkin AP. FastTree 2--approximately maximum-likelihood trees for large alignments. PloS one. 2010;5(3):e9490.
- 334 31. Vazquez-Baeza Y, Pirrung M, Gonzalez A, Knight R. EMPeror: a tool for visualizing high-throughput microbial community data.  
335 Gigascience. 2013;2(1):16.
- 336 32. Bates D, Maechler M, Bolker B, Walker S. Fitting Linear Mixed-Effects Models Using lme4. Journal of Statistical Software. 2015;67(1):1-  
337 48.

- 338 33. Oksanen J, Blanchet F, Kindt R. Package, "vegan". 2015.
- 339 34. McMurdie PJ, Holmes S. phyloseq: an R package for reproducible interactive analysis and graphics of microbiome census data. *PloS one*.  
340 2013;8(4):e61217.
- 341 35. Wickham H. *ggplot2: Elegant Graphics for Data Analysis*. New York, NY: Springer-Verlag; 2016.
- 342 36. Rea MC, O'Sullivan O, Shanahan F, O'Toole PW, Stanton C, Ross RP, et al. Clostridium difficile carriage in elderly subjects and associated  
343 changes in the intestinal microbiota. *Journal of clinical microbiology*. 2012;50(3):867-75.
- 344 37. Chen LA, Hourigan SK, Grigoryan Z, Gao Z, Clemente JC, Rideout JR, et al. Decreased Fecal Bacterial Diversity and Altered Microbiome in  
345 Children Colonized With Clostridium difficile. *Journal of pediatric gastroenterology and nutrition*. 2018.
- 346 38. Han SH, Yi J, Kim JH, Lee S, Moon HW. Composition of gut microbiota in patients with toxigenic Clostridioides (Clostridium) difficile:  
347 Comparison between subgroups according to clinical criteria and toxin gene load. *PloS one*. 2019;14(2):e0212626.
- 348 39. Fallani M, Rigottier-Gois L, Aguilera M, Bridonneau C, Collignon A, Edwards CA, et al. Clostridium difficile and Clostridium perfringens  
349 species detected in infant faecal microbiota using 16S rRNA targeted probes. *J Microbiol Methods*. 2006;67(1):150-61.
- 350 40. Vilson A, Ramadan Z, Li Q, Hedhammar A, Reynolds A, Spears J, et al. Disentangling factors that shape the gut microbiota in German  
351 Shepherd dogs. *PloS one*. 2018;13(3):e0193507.
- 352 41. McCafferty J, Muhlbauer M, Gharaibeh RZ, Arthur JC, Perez-Chanona E, Sha W, et al. Stochastic changes over time and not founder  
353 effects drive cage effects in microbial community assembly in a mouse model. *The ISME journal*. 2013;7(11):2116-25.

- 354 42. Hoy YE, Bik EM, Lawley TD, Holmes SP, Monack DM, Theriot JA, et al. Variation in Taxonomic Composition of the Fecal Microbiota in an  
355 Inbred Mouse Strain across Individuals and Time. *PloS one*. 2015;10(11):e0142825.
- 356 43. Milani C, Ticinesi A, Gerritsen J, Nouvenne A, Lugli GA, Mancabelli L, et al. Gut microbiota composition and *Clostridium difficile* infection  
357 in hospitalized elderly individuals: a metagenomic study. *Scientific reports*. 2016;6:25945.
- 358 44. Stecher B, Maier L, Hardt WD. 'Blooming' in the gut: how dysbiosis might contribute to pathogen evolution. *Nature reviews*  
359 *Microbiology*. 2013;11(4):277-84.
- 360 45. Perez-Cobas AE, Moya A, Gosalbes MJ, Latorre A. Colonization Resistance of the Gut Microbiota against *Clostridium difficile*. *Antibiotics*  
361 (Basel). 2015;4(3):337-57.
- 362 46. Shim JK, Johnson S, Samore MH, Bliss DZ, Gerding DN. Primary symptomless colonisation by *Clostridium difficile* and decreased risk of  
363 subsequent diarrhoea. *Lancet*. 1998;351(9103):633-6.
- 364 47. Merrigan MM, Sambol SP, Johnson S, Gerding DN. New approach to the management of *Clostridium difficile* infection: colonisation with  
365 non-toxigenic *C. difficile* during daily ampicillin or ceftriaxone administration. *Int J Antimicrob Agents*. 2009;33 Suppl 1:S46-50.
- 366 48. Kyne L, Warny M, Qamar A, Kelly CP. Asymptomatic carriage of *Clostridium difficile* and serum levels of IgG antibody against toxin A. *The*  
367 *New England journal of medicine*. 2000;342(6):390-7.
- 368 49. Hopkins MJ, Macfarlane GT. Changes in predominant bacterial populations in human faeces with age and with *Clostridium difficile*  
369 infection. *Journal of medical microbiology*. 2002;51(5):448-54.



- 370 50. Louie TJ, Emery J, Krulicki W, Byrne B, Mah M. OPT-80 eliminates *Clostridium difficile* and is sparing of bacteroides species during  
371 treatment of *C. difficile* infection. *Antimicrobial agents and chemotherapy*. 2009;53(1):261-3.
- 372 51. Smith HW. The development of the flora of the alimentary tract in young animals. *J Pathol Bacteriol*. 1965;90(2):495-513.
- 373 52. Skraban J, Dzeroski S, Zenko B, Mongus D, Gangl S, Rupnik M. Gut microbiota patterns associated with colonization of different  
374 *Clostridium difficile* ribotypes. *PloS one*. 2013;8(2):e58005.
- 375 53. Coelho LP, Kultima JR, Costea PI, Fournier C, Pan Y, Czarnecki-Maulden G, et al. Similarity of the dog and human gut microbiomes in gene  
376 content and response to diet. *Microbiome*. 2018;6(1):72.
- 377 54. Deng P, Swanson KS. Gut microbiota of humans, dogs and cats: current knowledge and future opportunities and challenges. *Br J Nutr*.  
378 2015;113 Suppl:S6-17.
- 379 55. Montgomery M, Robertson S, Koski L, al. e. Multidrug-Resistant *Campylobacter jejuni* Outbreak Linked to Puppy Exposure — United  
380 States, 2016–2018. 2018.
- 381



bioRxiv preprint doi: <https://doi.org/10.1101/599647>; this version posted April 4, 2019. The copyright holder for this preprint (which was not certified by peer review) is the author/funder, who has granted bioRxiv a license to display the preprint in perpetuity. It is made available under a [CC-BY 4.0 International license](#).

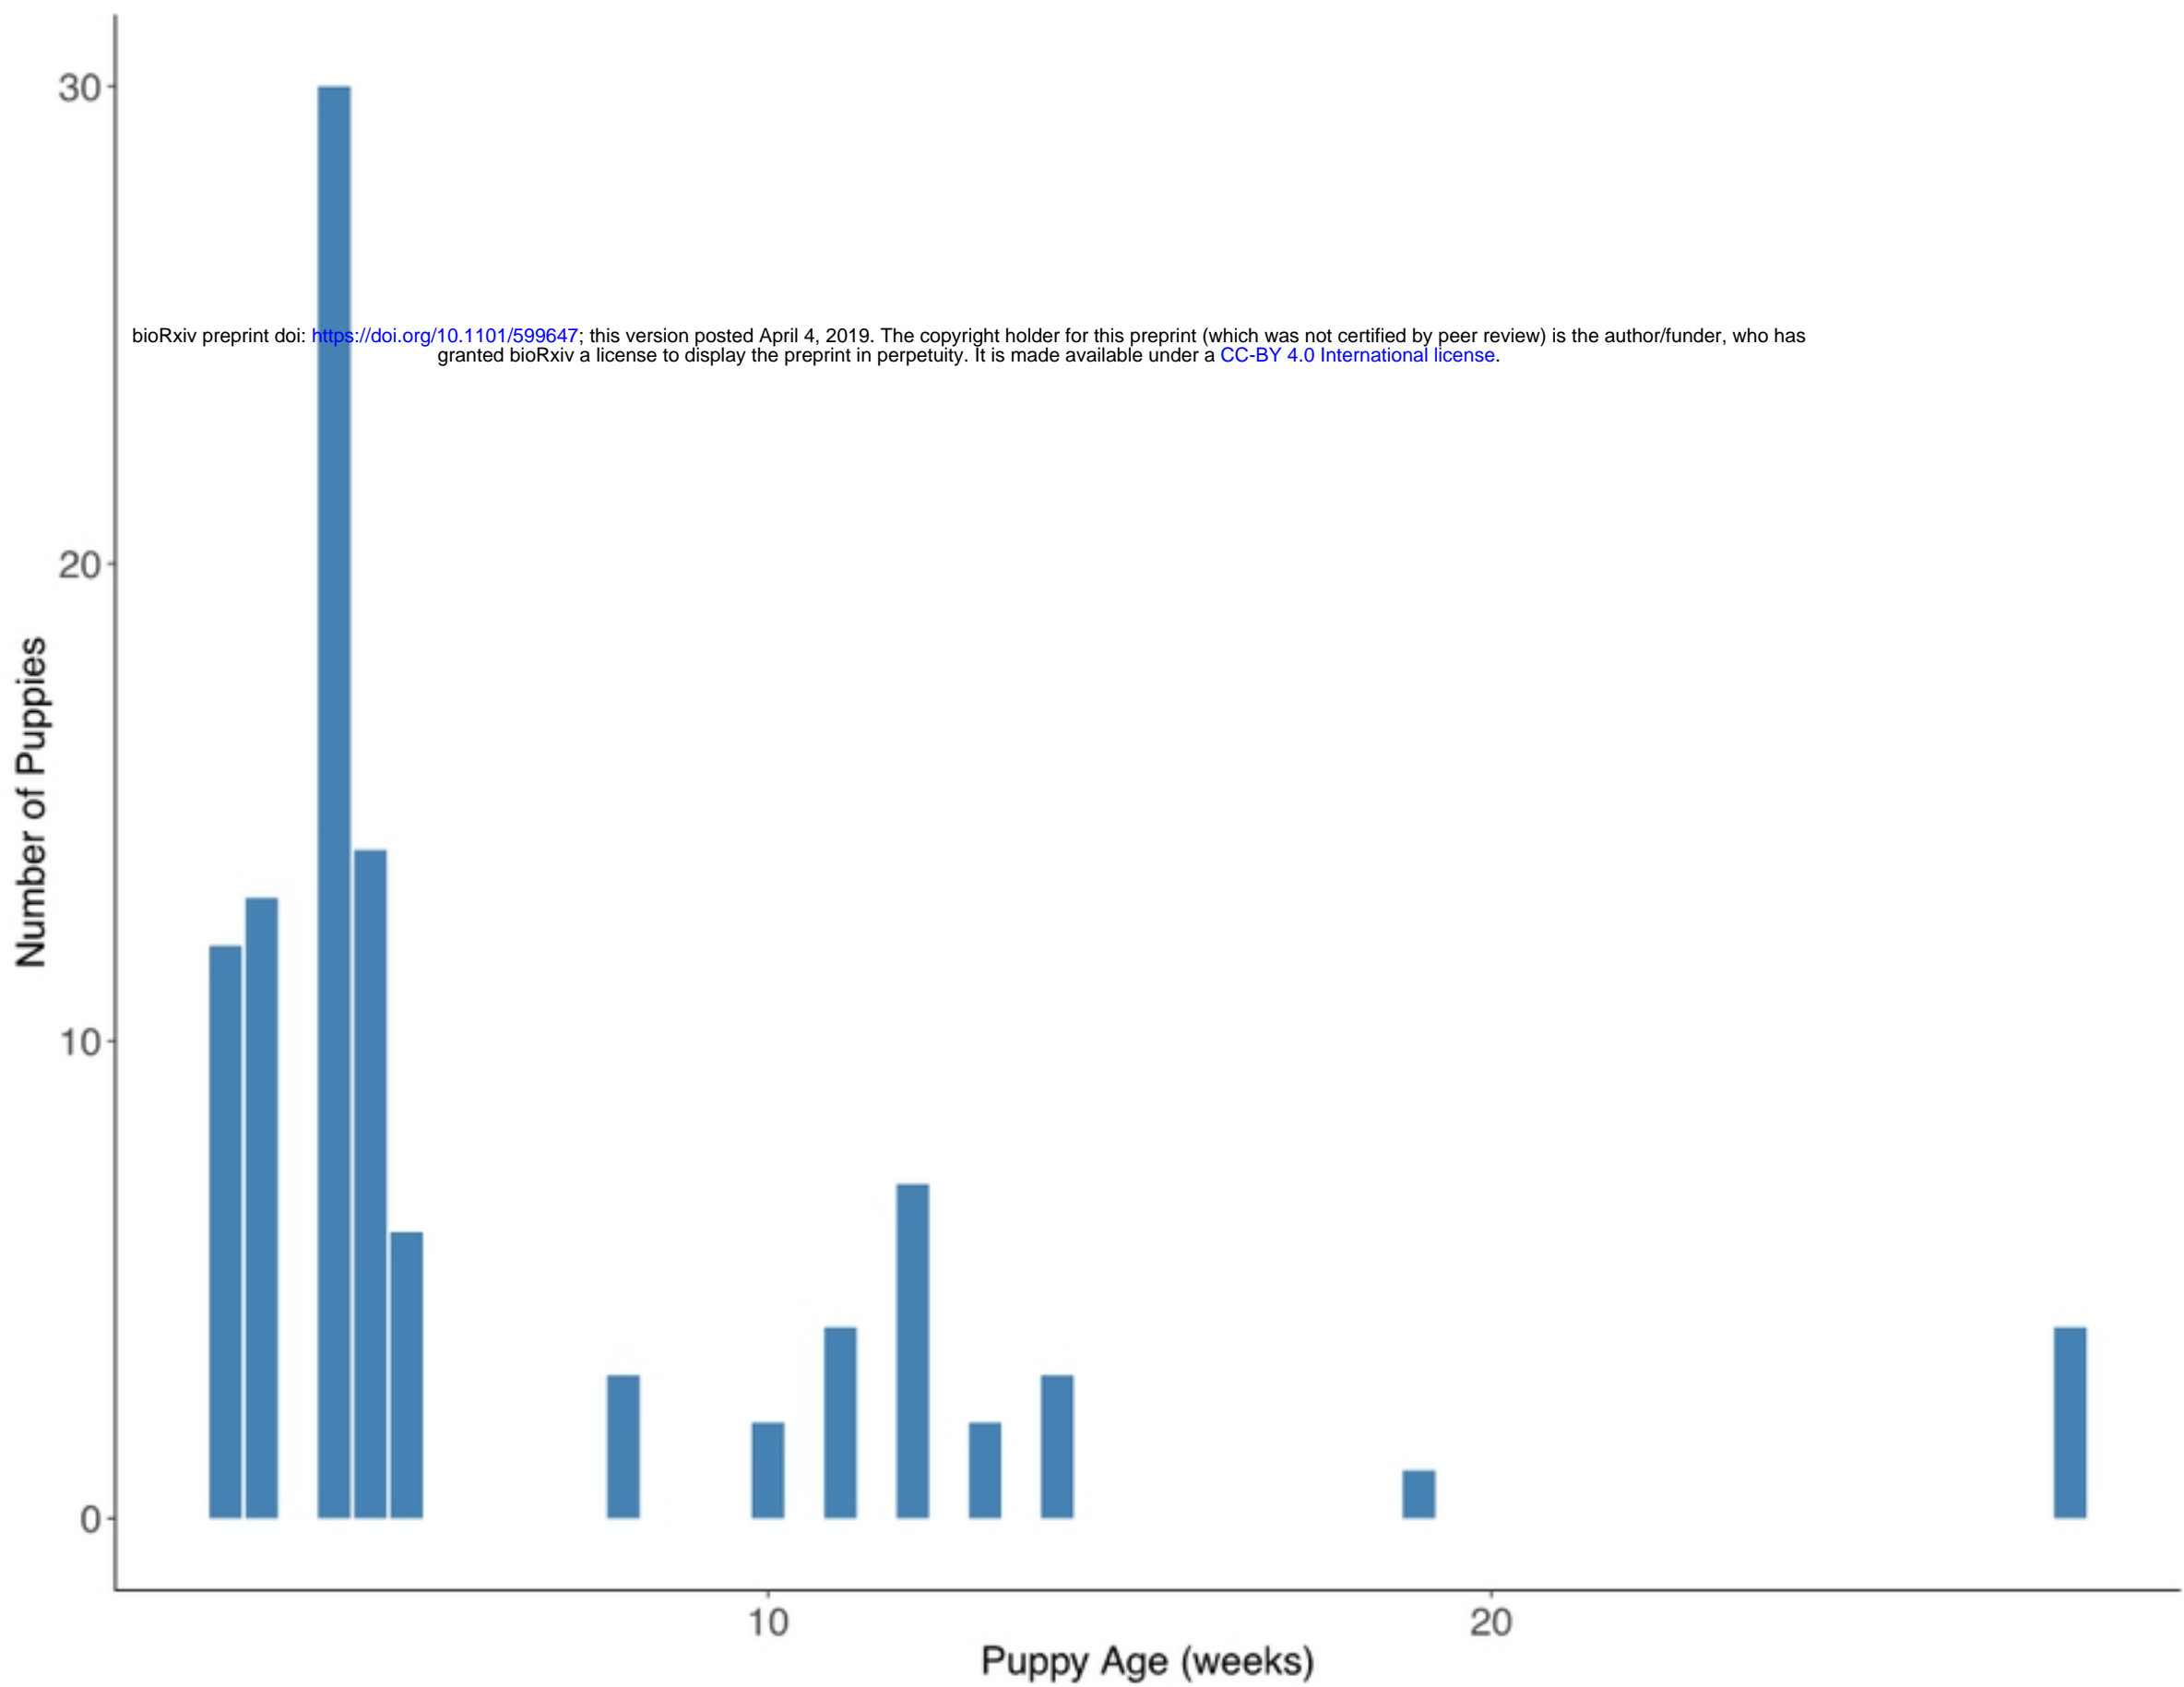

Figure

bioRxiv preprint doi: <https://doi.org/10.1101/599647>; this version posted April 4, 2019. The copyright holder for this preprint (which was not certified by peer review) is the author/funder, who has granted bioRxiv a license to display the preprint in perpetuity. It is made available under a [CC-BY 4.0 International license](#).

Shannon Alpha Diversity

5  
4  
3  
2  
1

Positive

Negative

*C. difficile* status

Figure

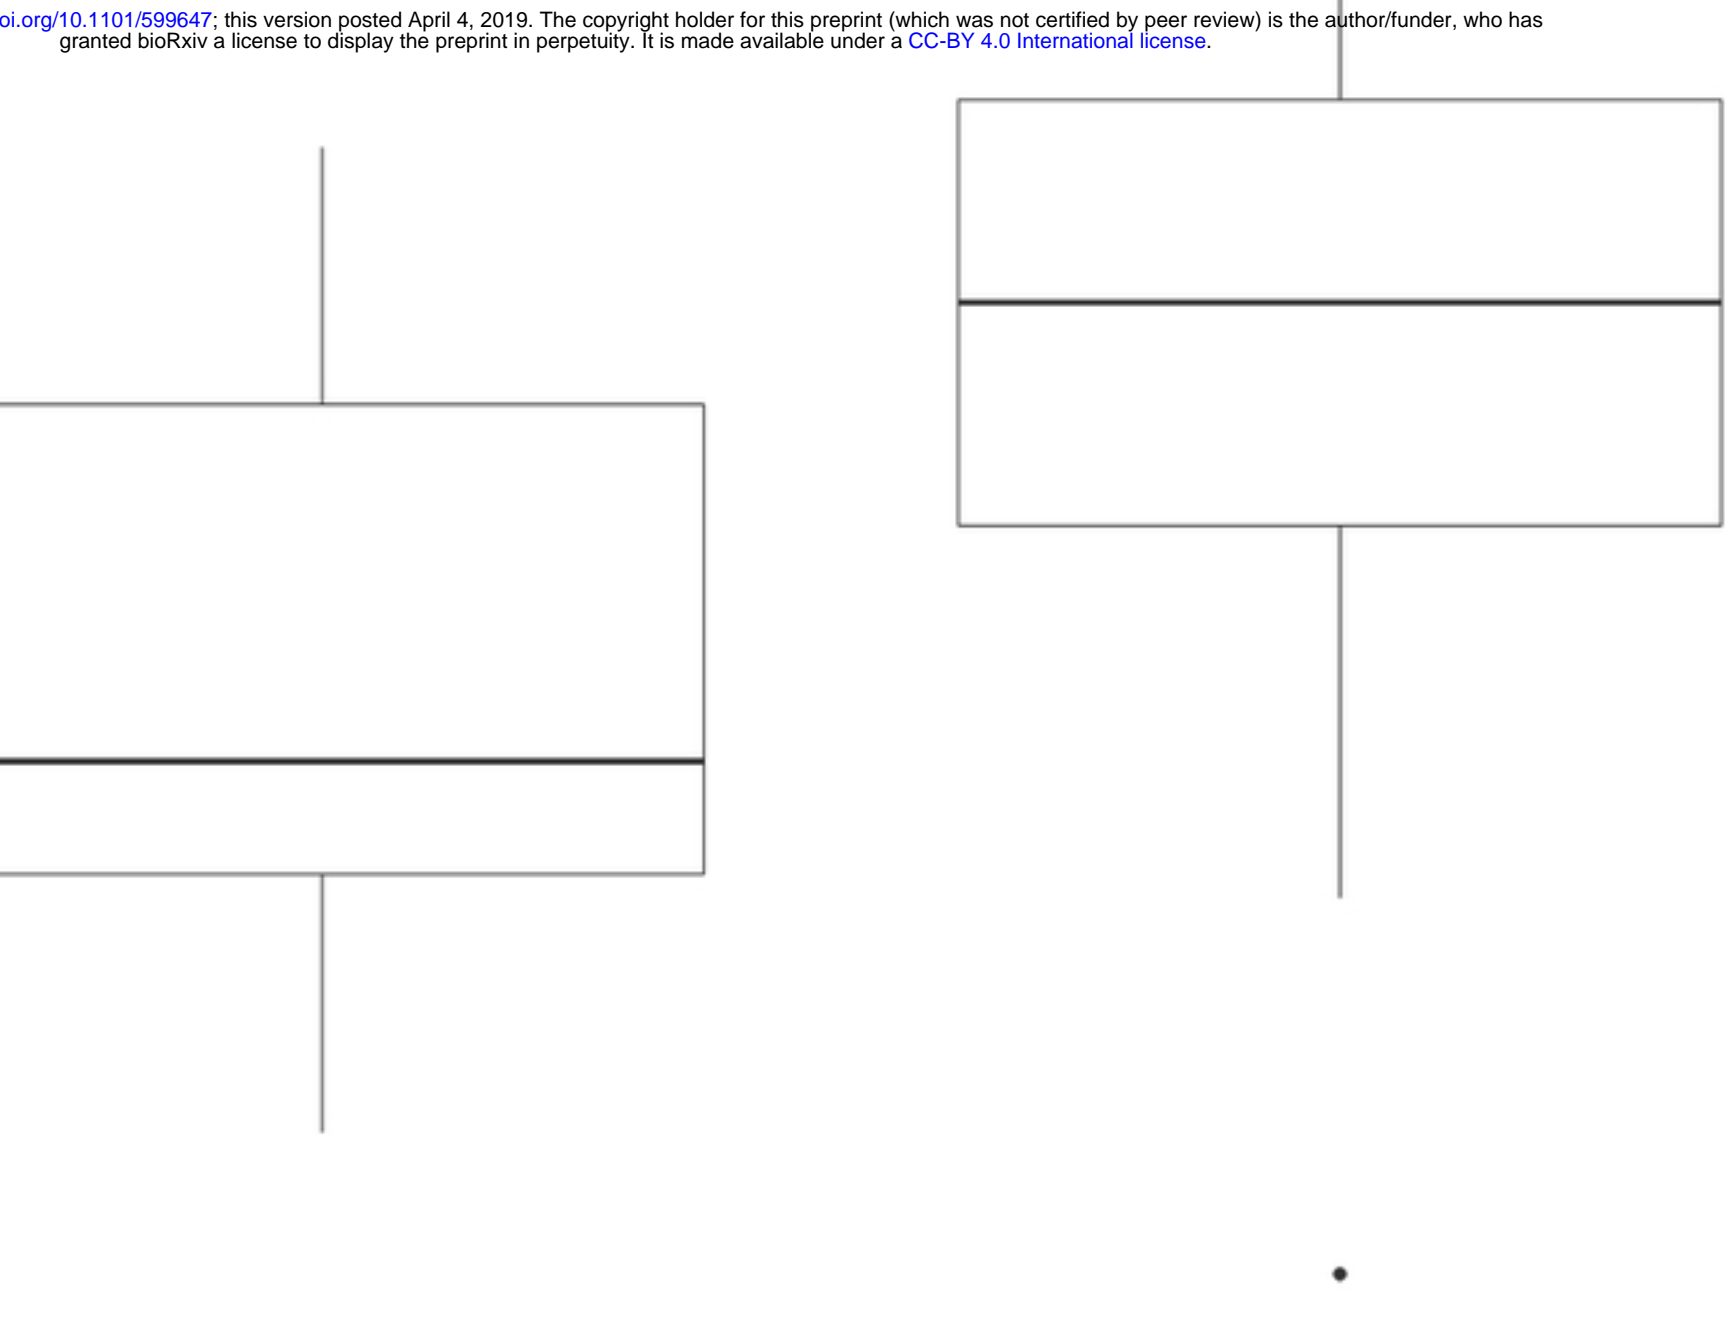

# Bray-Curtis

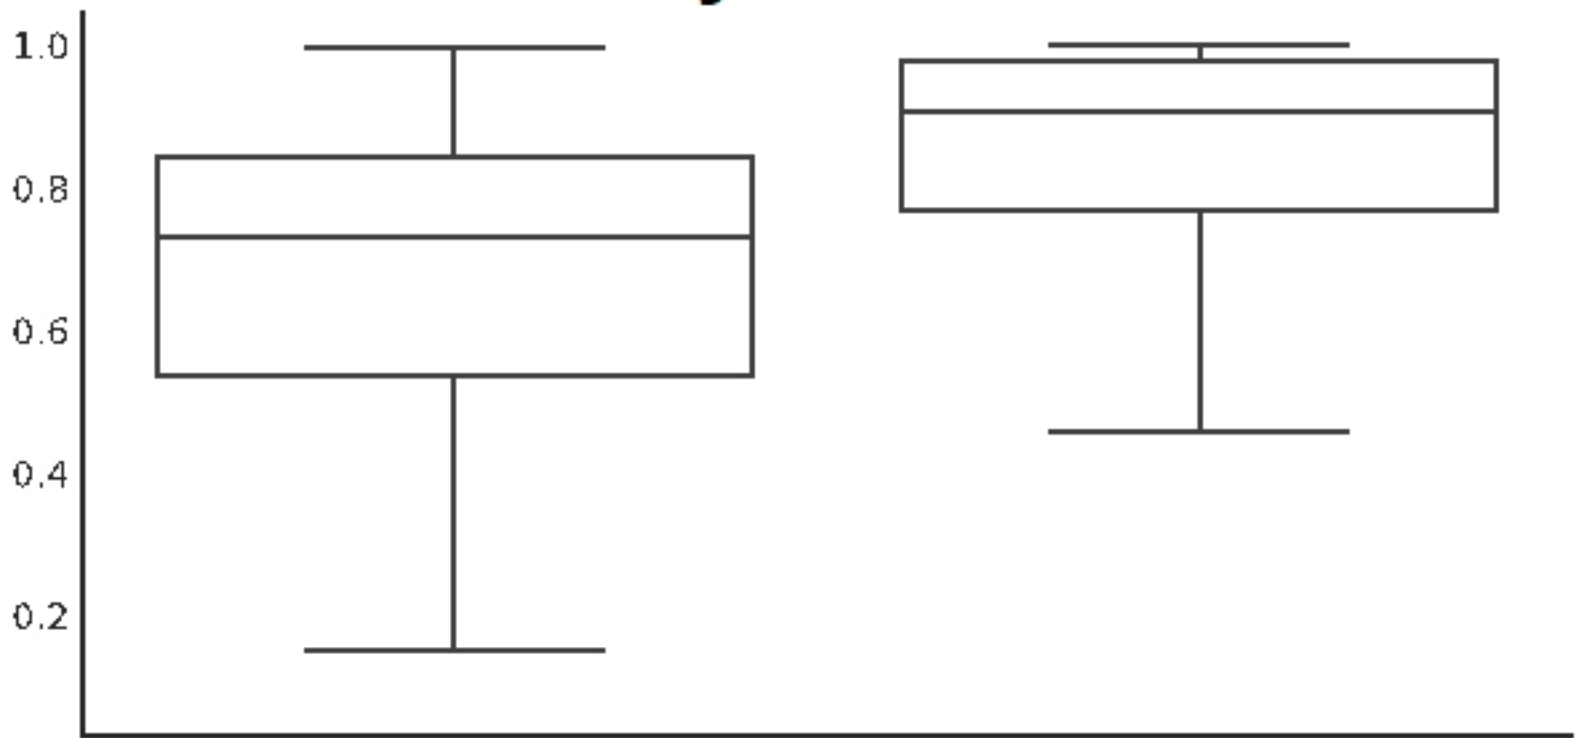

# Unweighted Unifrac

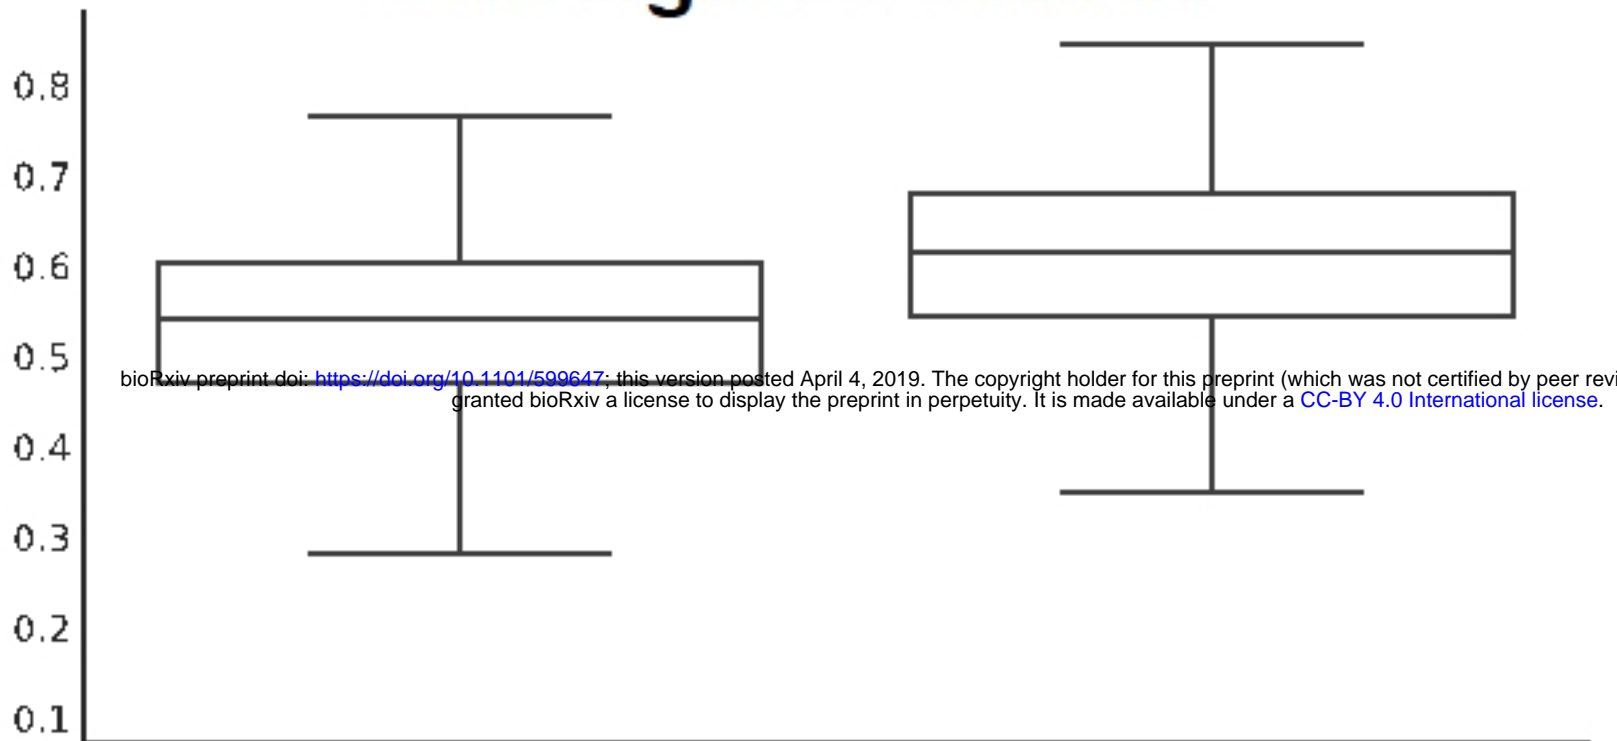

bioRxiv preprint doi: <https://doi.org/10.1101/599647>; this version posted April 4, 2019. The copyright holder for this preprint (which was not certified by peer review) is the author/funder, who has granted bioRxiv a license to display the preprint in perpetuity. It is made available under a [CC-BY 4.0 International license](#).

# Weighted Unifrac

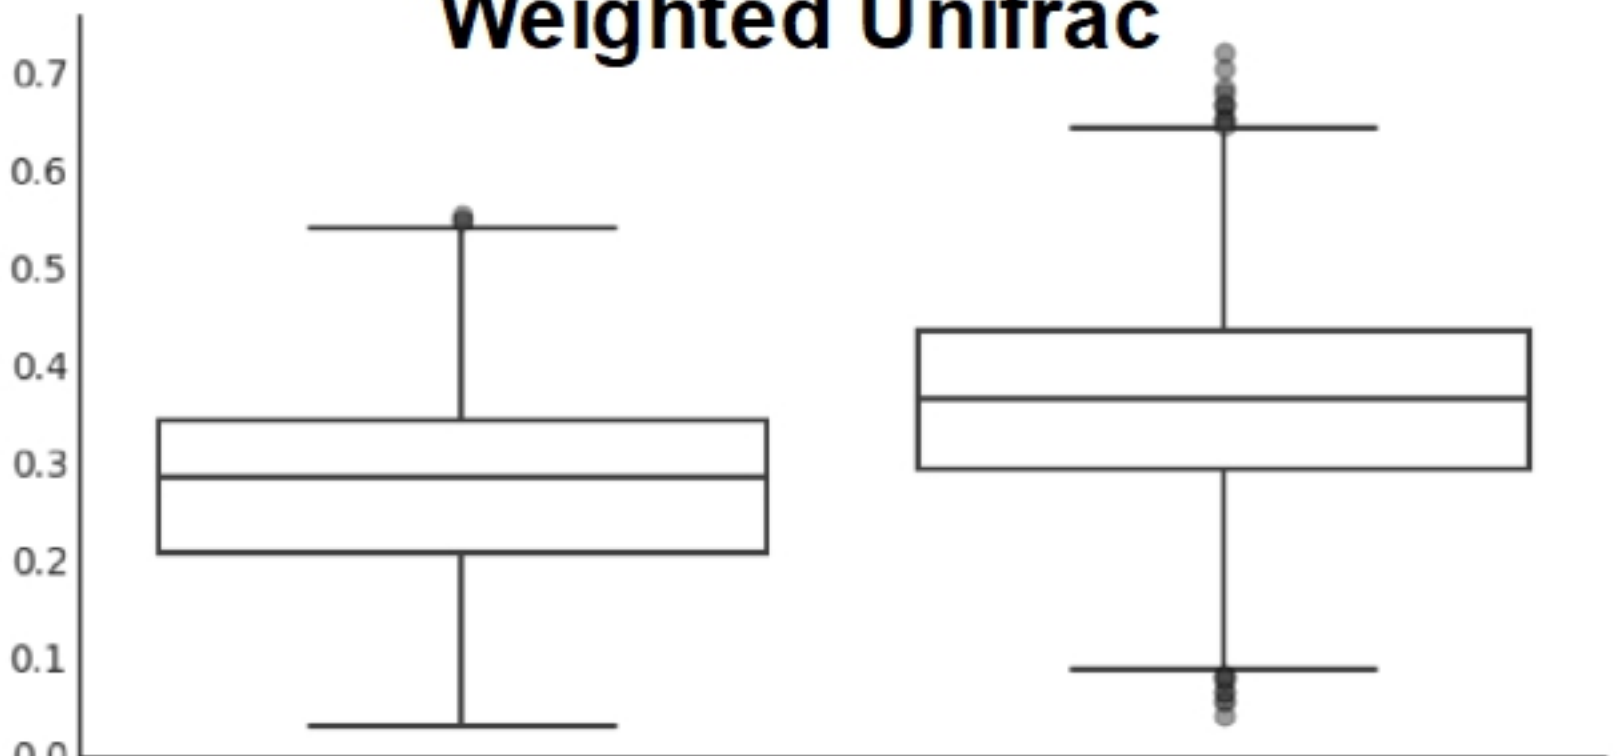

**Positive**

**Negative**

***C. difficile* status**

bioRxiv preprint doi: <https://doi.org/10.1101/599647>; this version posted April 4, 2019. The copyright holder for this preprint (which was not certified by peer review) is the author/funder, who has granted bioRxiv a license to display the preprint in perpetuity. It is made available under aCC-BY-NC-ND 4.0 International license.

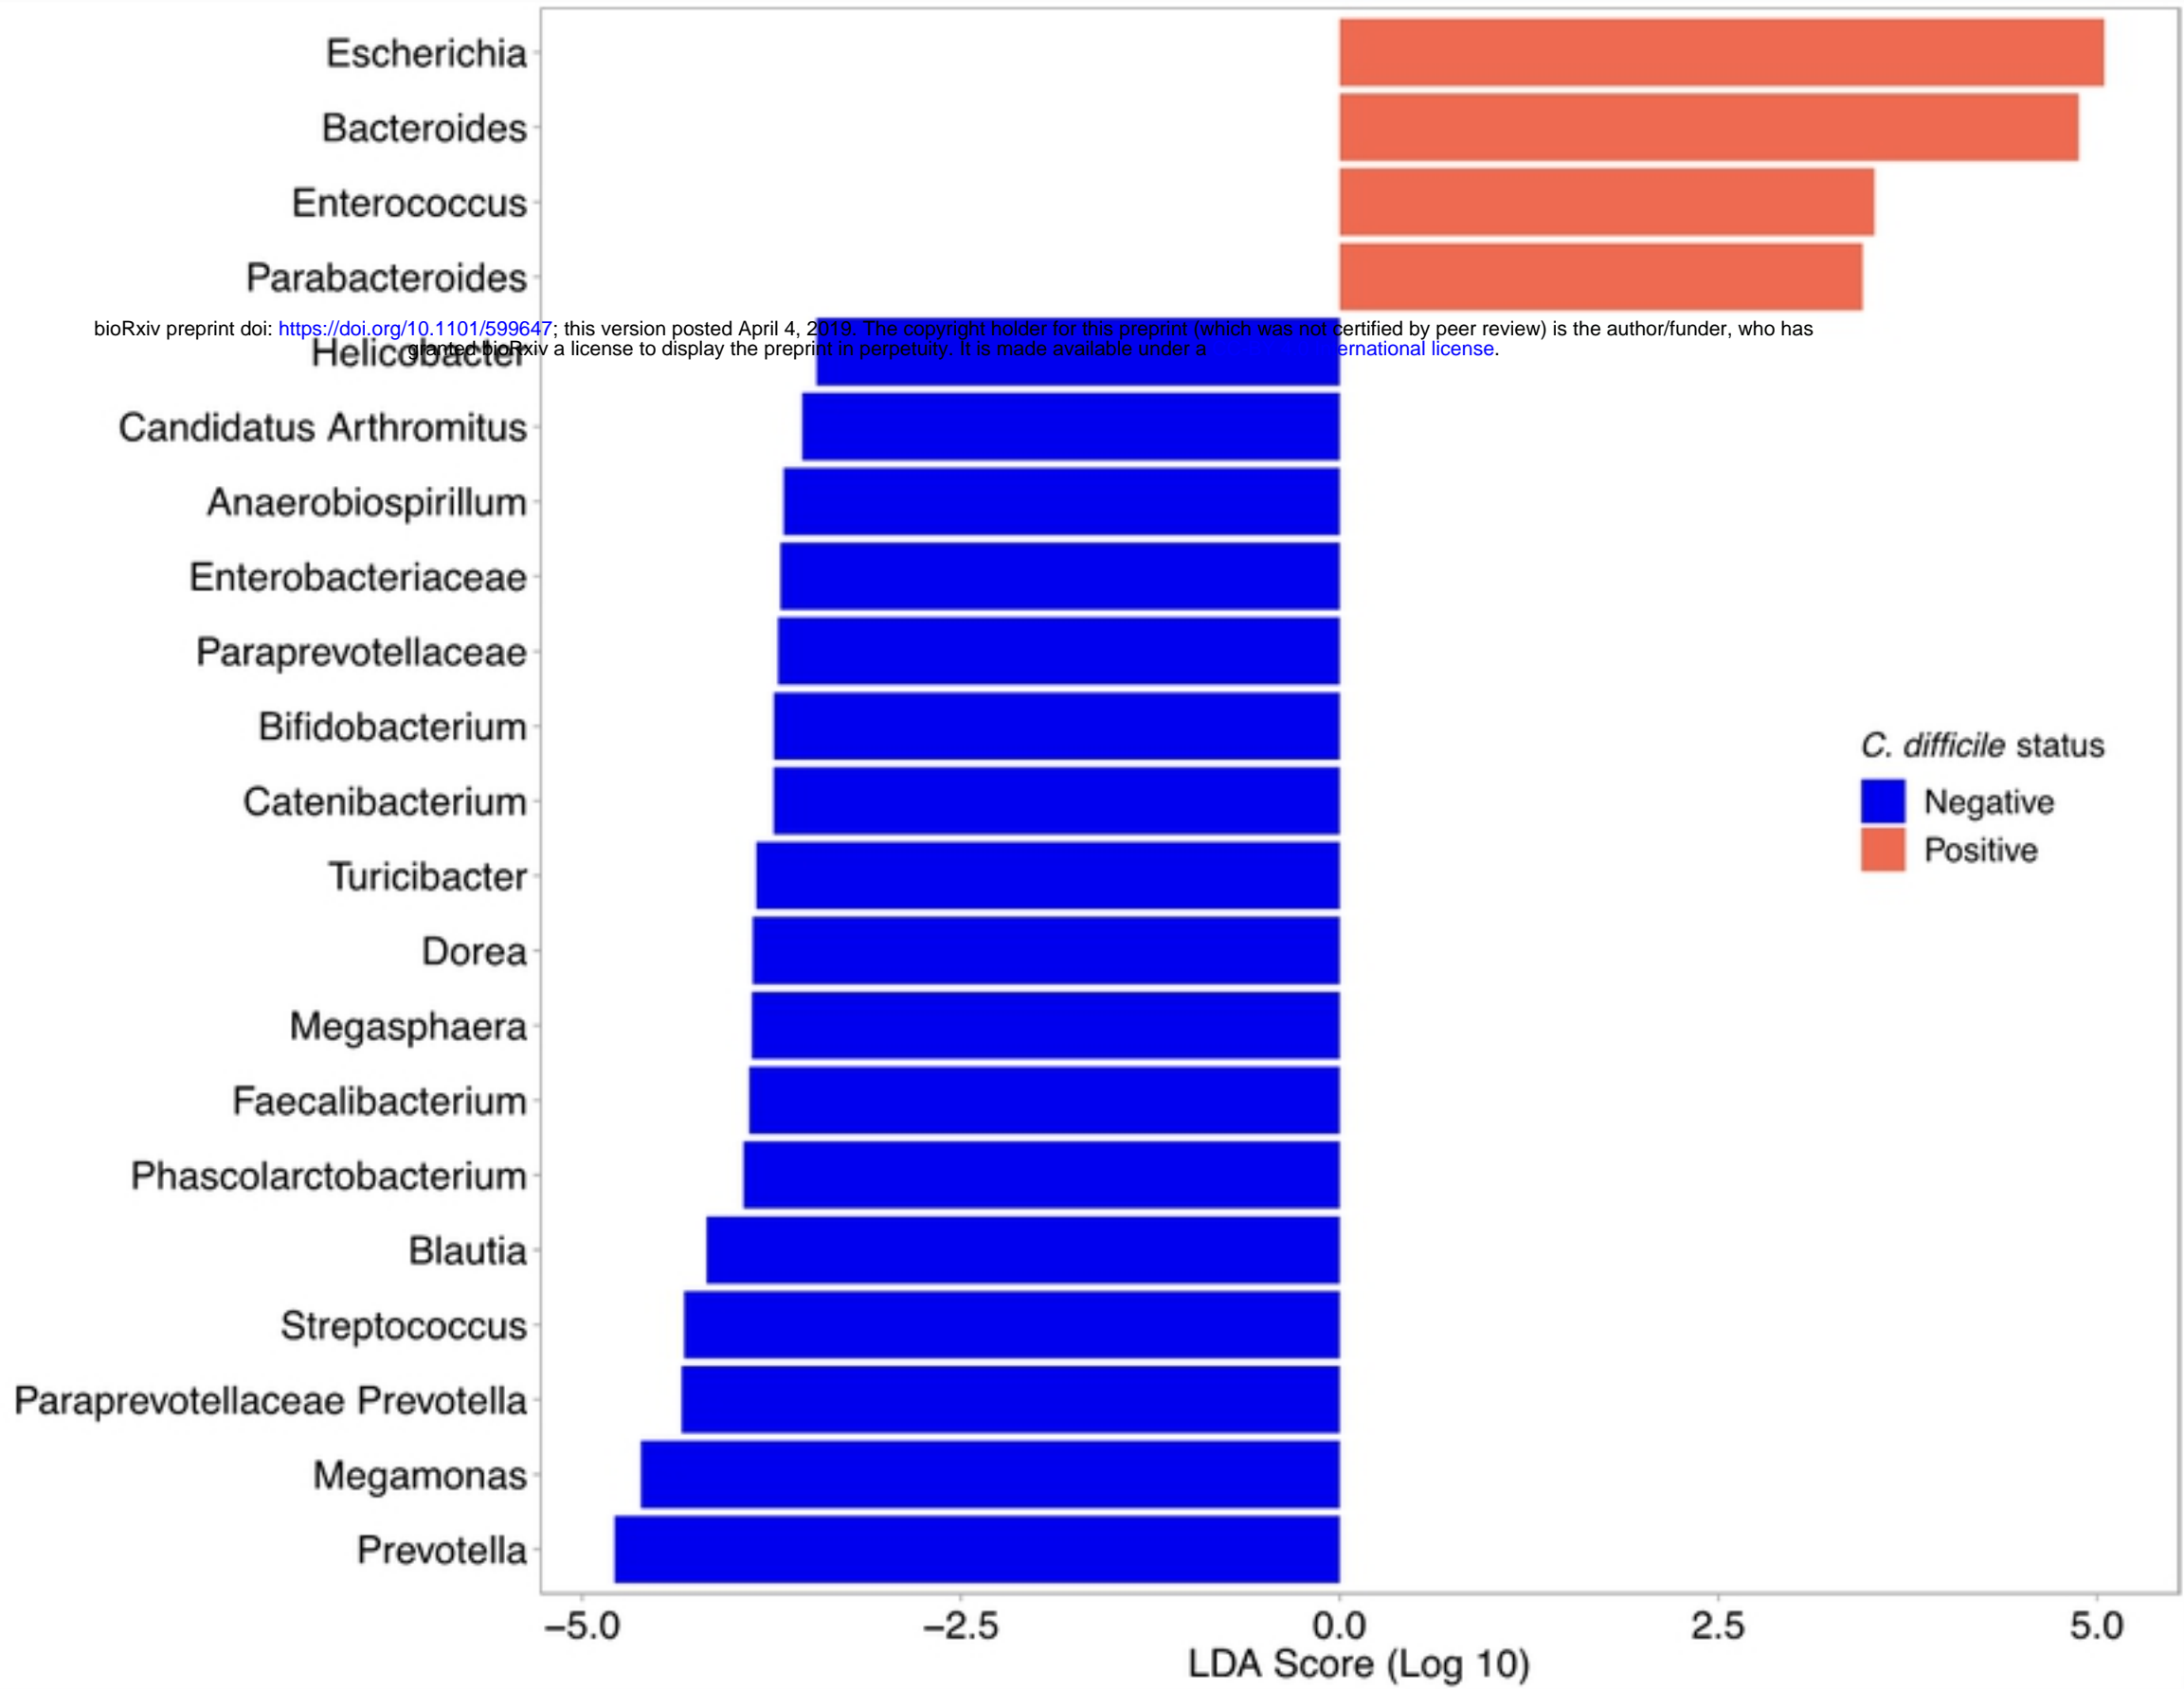

Figure

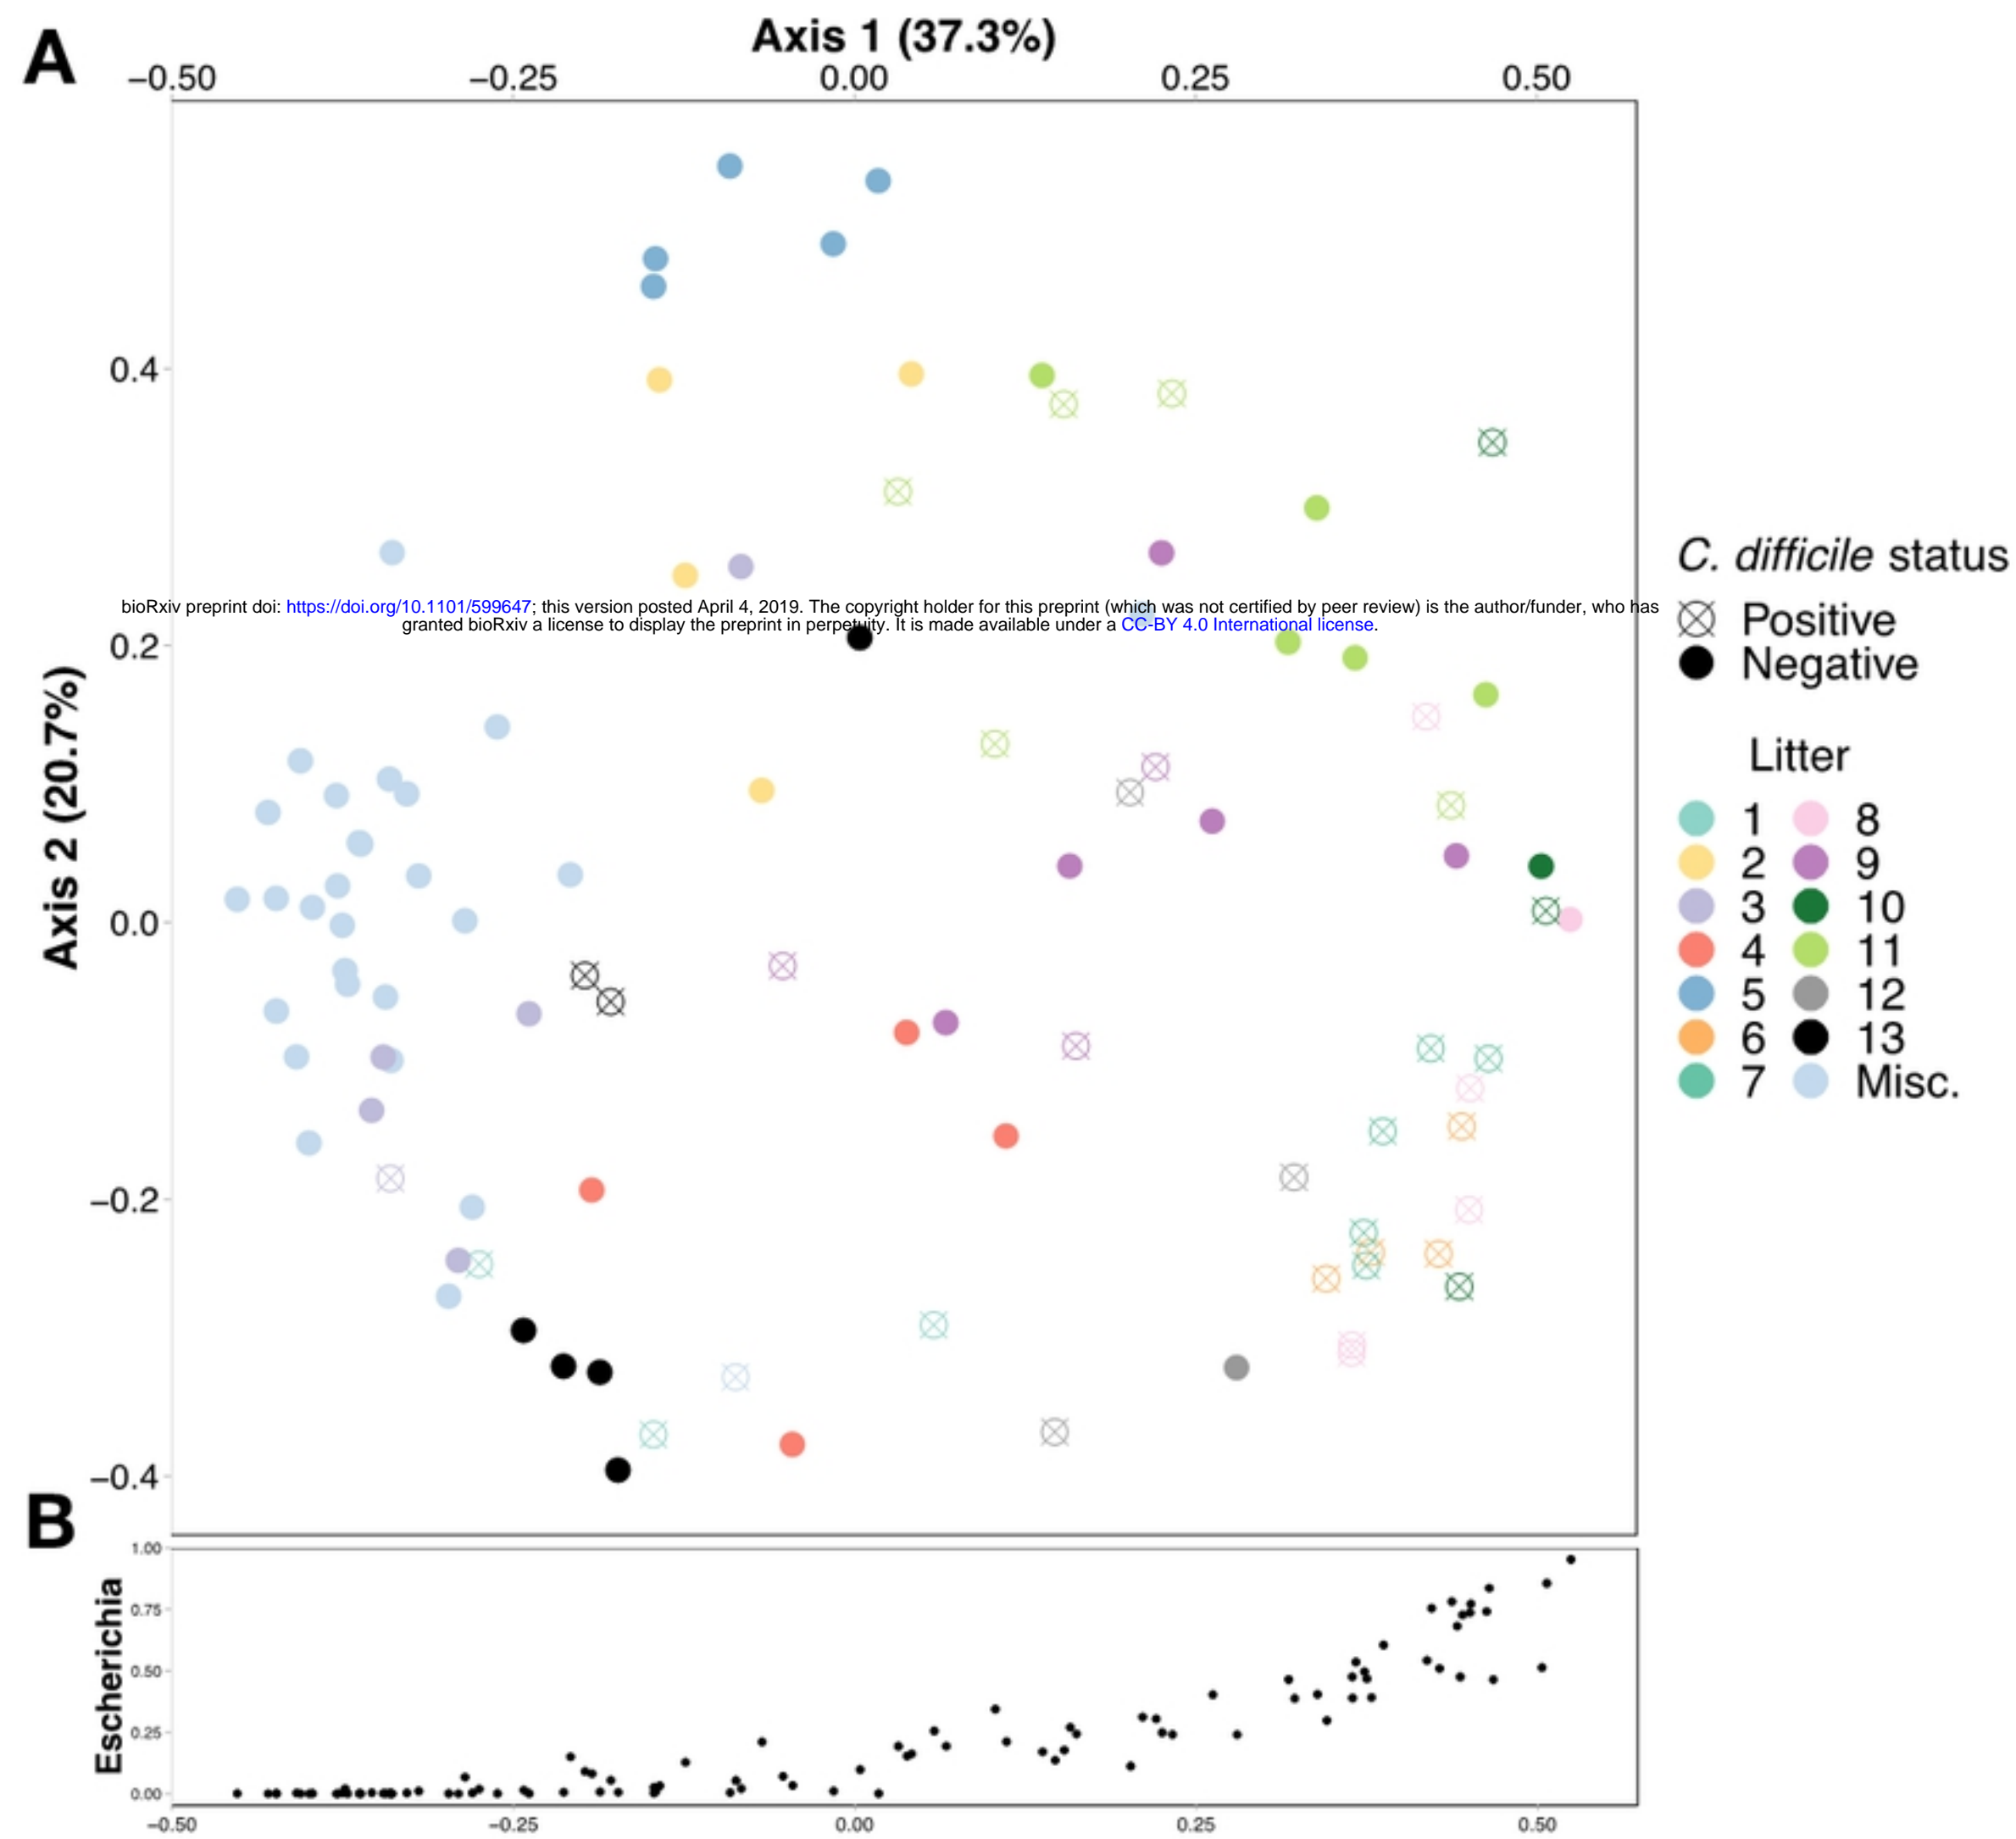

Figure
